# Supplementary material for: Pulmonary tumor thrombotic microangiopathy: a systematic review
Source: PubMed Central journal article supplement — Pulm Circ. 2019 May 28;9(2):2045894019851000. doi: 10.1177/2045894019851000 (PMC6540517; doi:10.1177/2045894019851000), 2019-05-28
Supplement: Supplemental_Material2.pdf [file Supplemental_Material2.pdf]

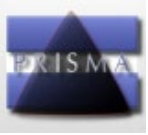

## PRISMA 2009 Flow Diagram

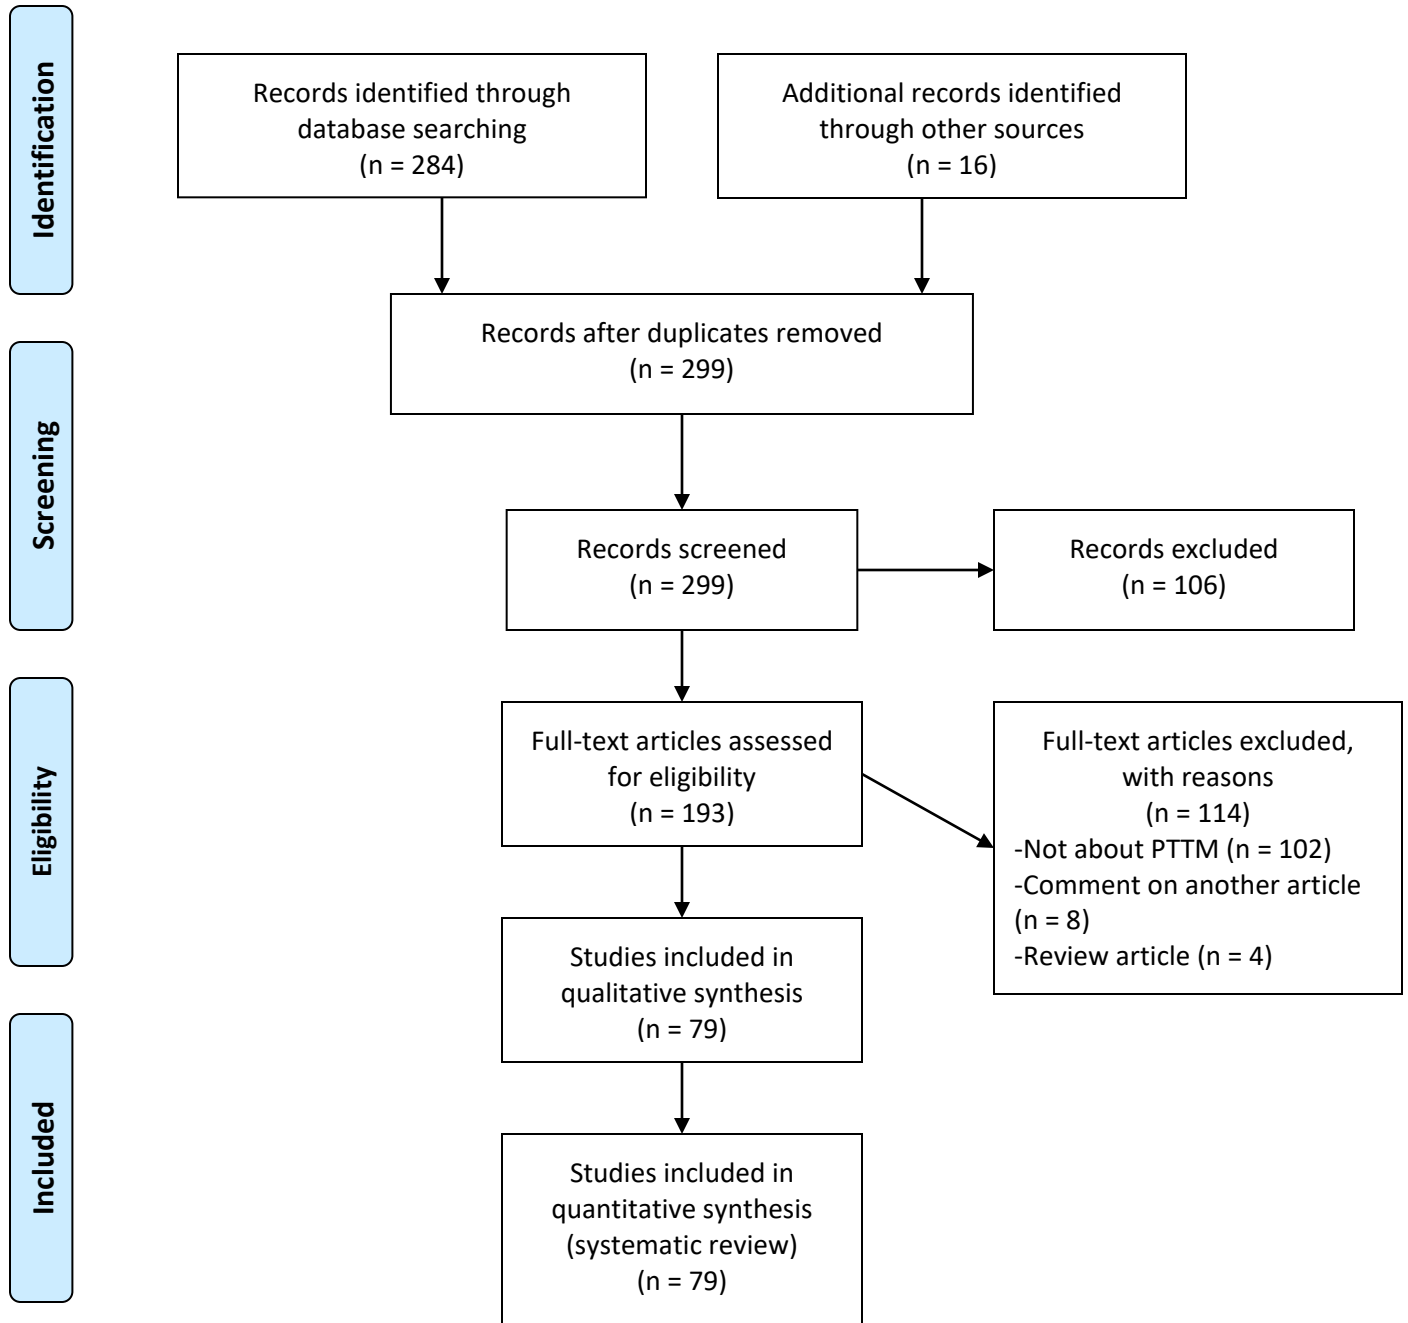

From: Moher D, Liberati A, Tetzlaff J, Altman DG, The PRISMA Group (2009). Preferred Reporting Items for Systematic Reviews and Meta-Analyses: The PRISMA Statement. PLoS Med 6(7): e1000097. doi:10.1371/journal.pmed1000097

For more information, visit [www.prisma-statement.org](http://www.prisma-statement.org).
